# Supplementary material
Source: publisher figshare collection journal article supplement (https://tandf.figshare.com/ndownloader/files/21084861)
Supplement: Supplementary file 1 [file 21084861]

**Effects of the molecular weight and molar ratio of poly(2-ethyl-oxazoline)-based lipid on the pH sensitivity, stability, and antitumor efficacy of liposomes**

Luqiao Wen, Shouzhen Huang, Weiang Du, Caili Zhu, Huan Xu<sup>\*</sup>

Department of Pharmacy, College of chemistry and chemical engineering, Liaoning normal university, Dalian 116029, People's Republic of China.

CONTACT Huan Xu ✉ [huan.xu1@163.com](mailto:huan.xu1@163.com) 📍 Department of Pharmacy, College of chemistry and chemical engineering, Liaoning normal university, Dalian 116029, People's Republic of China

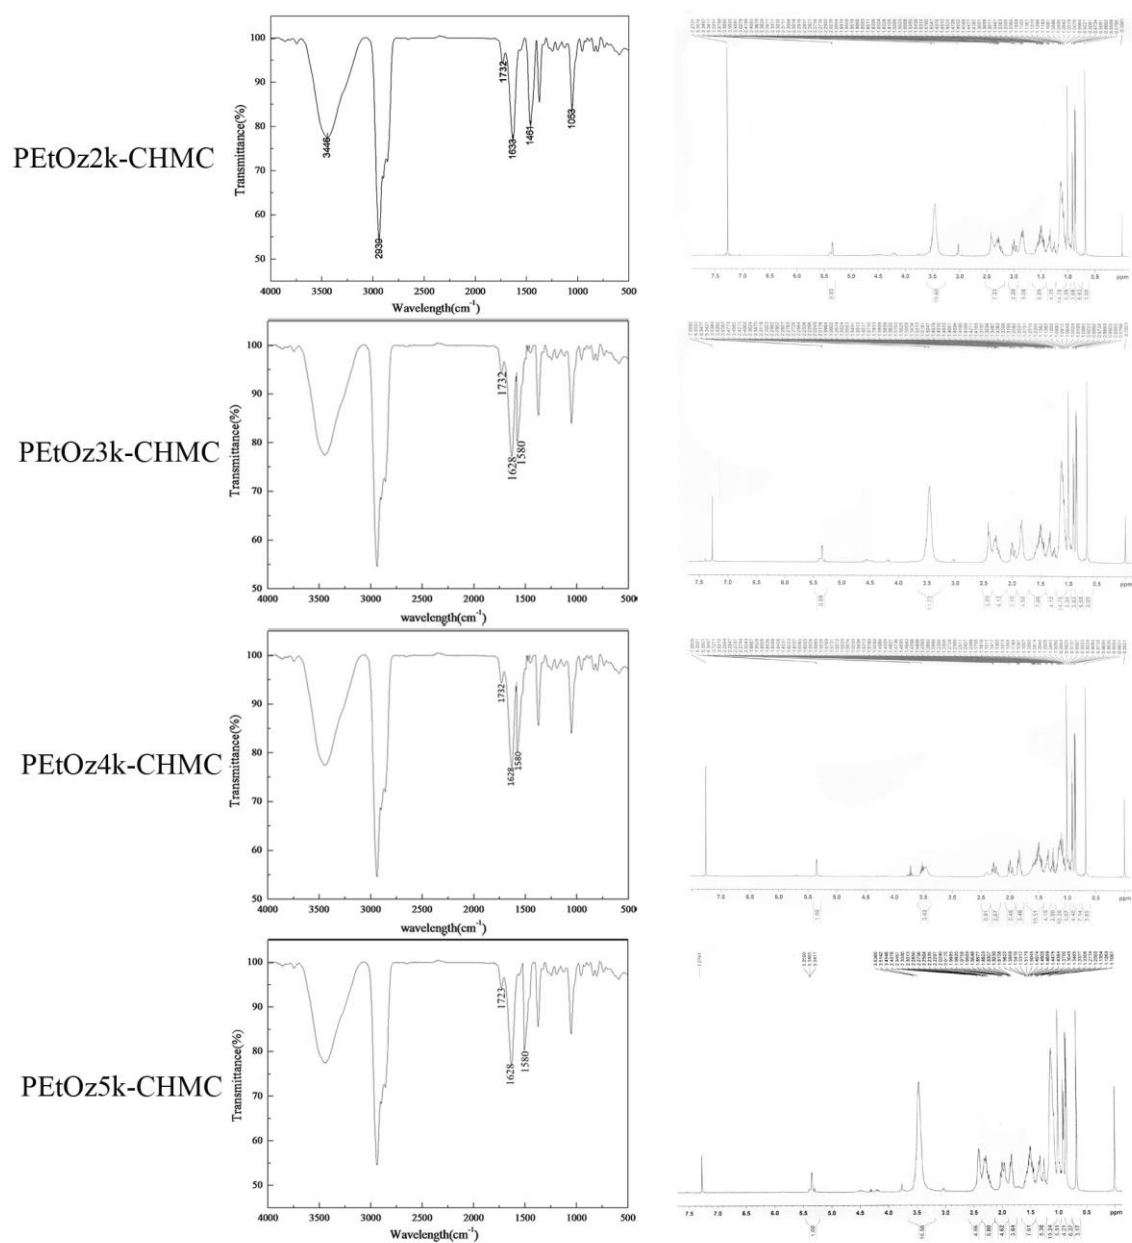

Figure S1. FT-IR spectrum and  $^1\text{H}$  NMR spectrum of PEtOz-CHMC with different molecular weights.

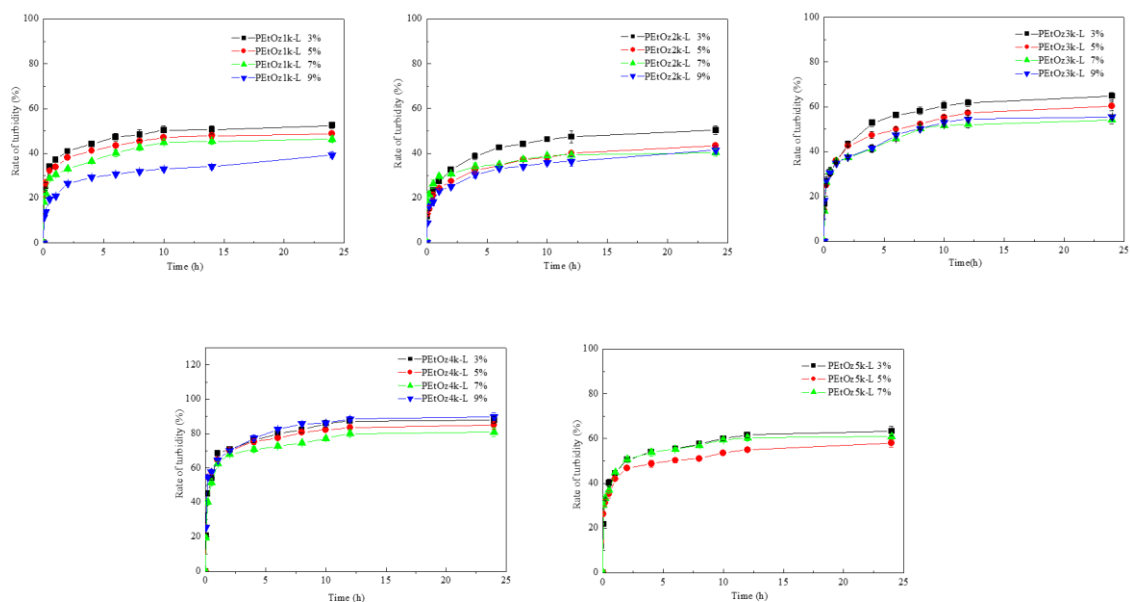

Figure S2. Changes in the turbidity of liposomes when incubated in 3 mM  $\text{CaCl}_2$  for different time.

The images in figure show the appearance of different molecular weights and molar ratios PEtOz-coated liposomes incubated with  $\text{CaCl}_2$  solution for 24 h. Data are represented as the mean  $\pm$ S.D. (n=3).

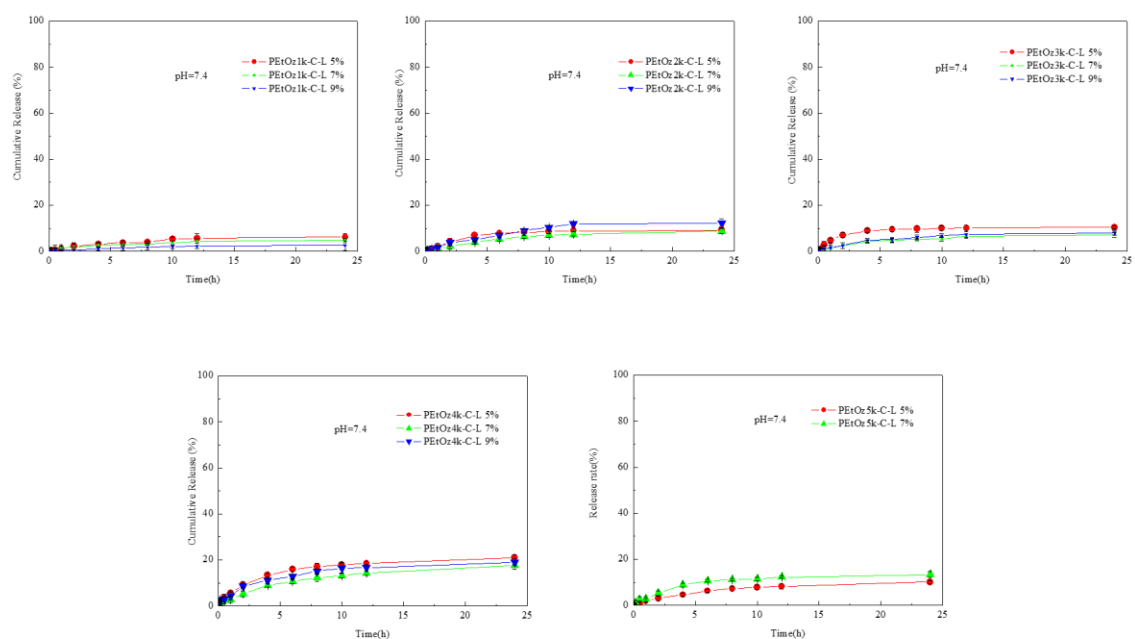

Figure S3. Drug release profiles for calcein-load liposomes modified by PEtOz-CHMC with different molecular weights and molar ratios at pH 7.4 after 24 h incubation. Data are represented as the mean  $\pm$  S.D. (n=3).

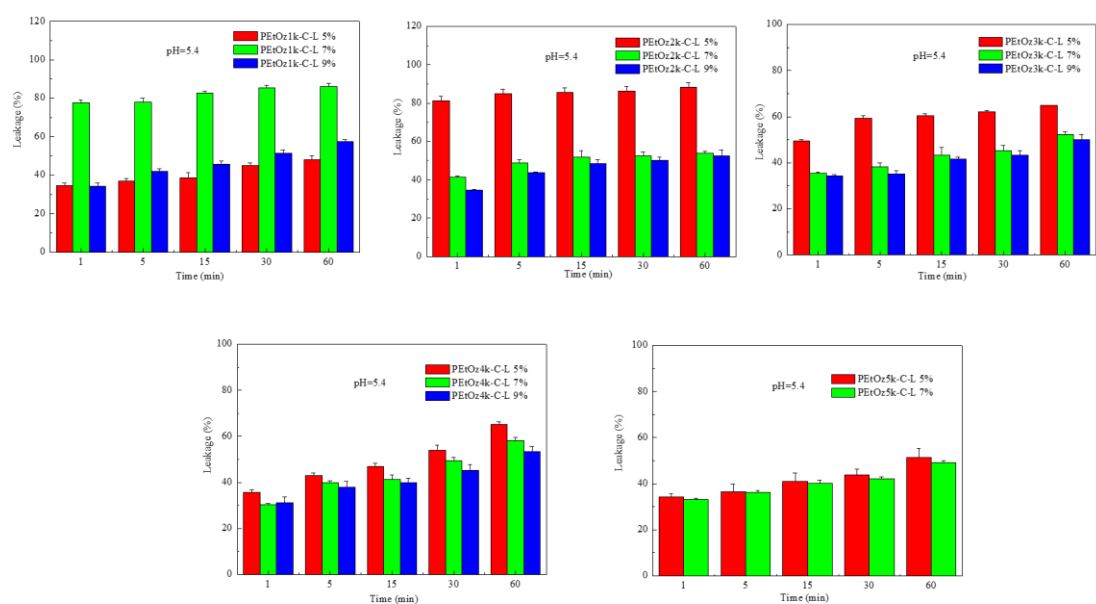

Figure S4. pH-dependent calcein release from calcein-load liposomes modified by PEtOz-CHMC with different molecular weights and molar ratios at pH 5.4 after 60 min incubation. Data are represented as the mean  $\pm$  S.D. (n=3).

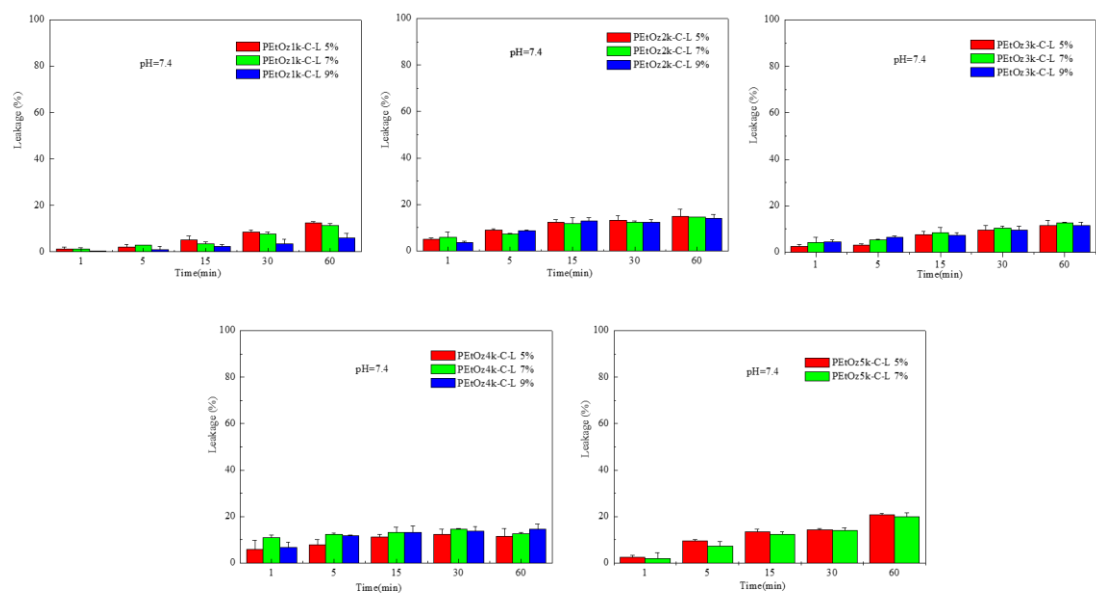

Figure S5. Calcein release from calcein-load liposomes modified by PEtOz-CHMC with different molecular weights and molar ratios at pH 7.4 after 60 min incubation. Data are represented as the mean  $\pm$  S.D. (n=3).
